# Supplementary material
Source: PubMed Central journal article supplement (PMC10900964)
Supplement: jama-e240196-s002.pdf [file jama-e240196-s002.pdf]

Sanchez-Pinto LN, Bennett TD, DeWitt PE, et al; Society of Critical Care Medicine Pediatric Sepsis Definition Task Force. Development and validation of the Phoenix criteria for pediatric sepsis and septic shock. *JAMA*. Published online January 21, 2024. doi:10.1001/jama.2024.0196

## Data Sharing Statement

### Data

**Data available:** No

### Additional Information

**Explanation for why data not available:** The data that support the findings of this study are not publicly available because the study sites retain data ownership. The data contain information that could compromise the privacy of research participants. We will share analytic code in free, publicly available repositories hosted by the gold-standard code-sharing site, GitHub ([github.com](https://github.com)).
